# Supplementary material for: Identification of myocardial infarction type from electronic hospital data in England and Australia: a comparative data linkage study
Source: PubMed Central journal article supplement — BMJ Open. 2017 Nov 12;7(11):e019217. doi: 10.1136/bmjopen-2017-019217 (PMC5695341; doi:10.1136/bmjopen-2017-019217), 2017-11-12
Supplement: bmjopen-2017-019217.draft_revisions.pdf [file bmjopen-2017-019217.draft_revisions.pdf]

# BMJ Open

BMJ Open is committed to open peer review. As part of this commitment we make the peer review history of every article we publish publicly available.

When an article is published we post the peer reviewers' comments and the authors' responses online. We also post the versions of the paper that were used during peer review. These are the versions that the peer review comments apply to.

The versions of the paper that follow are the versions that were submitted during the peer review process. They are not the versions of record or the final published versions. They should not be cited or distributed as the published version of this manuscript.

BMJ Open is an open access journal and the full, final, typeset and author-corrected version of record of the manuscript is available on our site with no access controls, subscription charges or pay-per-view fees (<http://bmjopen.bmj.com>).

If you have any questions on BMJ Open's open peer review process please email [editorial.bmjopen@bmj.com](mailto:editorial.bmjopen@bmj.com)

# BMJ Open

## Identification of myocardial infarction type from electronic hospital data in England and Australia

|                                 |                                                                                                                                                                                                                                                                                                                                                                                                                                                                                                                                              |
|---------------------------------|----------------------------------------------------------------------------------------------------------------------------------------------------------------------------------------------------------------------------------------------------------------------------------------------------------------------------------------------------------------------------------------------------------------------------------------------------------------------------------------------------------------------------------------------|
| Journal:                        | <i>BMJ Open</i>                                                                                                                                                                                                                                                                                                                                                                                                                                                                                                                              |
| Manuscript ID                   | bmjopen-2017-019217                                                                                                                                                                                                                                                                                                                                                                                                                                                                                                                          |
| Article Type:                   | Research                                                                                                                                                                                                                                                                                                                                                                                                                                                                                                                                     |
| Date Submitted by the Author:   | 18-Aug-2017                                                                                                                                                                                                                                                                                                                                                                                                                                                                                                                                  |
| Complete List of Authors:       | Nedkoff, Lee; University of Western Australia, School of Population and Global Health<br>Lopez, Derrick; University of Western Australia, School of Population and Global Health<br>Goldacre, Michael; University of Oxford, Unit of Health-Care Epidemiology, Department of Public Health<br>Sanfilippo, Frank; The University of Western Australia, School of Population and Global Health<br>Hobbs, Michael; University of Western Australia, School of Population and Global Health<br>Wright, Lucy; University of Oxford, Public Health |
| <b>Primary Subject Heading</b>: | Epidemiology                                                                                                                                                                                                                                                                                                                                                                                                                                                                                                                                 |
| Secondary Subject Heading:      | Cardiovascular medicine, Epidemiology                                                                                                                                                                                                                                                                                                                                                                                                                                                                                                        |
| Keywords:                       | Myocardial infarction < CARDIOLOGY, Cardiac Epidemiology < CARDIOLOGY, STATISTICS & RESEARCH METHODS                                                                                                                                                                                                                                                                                                                                                                                                                                         |
|                                 |                                                                                                                                                                                                                                                                                                                                                                                                                                                                                                                                              |

SCHOLARONE™  
Manuscripts

only

1  
2  
3 **Identification of myocardial infarction type from electronic hospital data in England and**  
4 **Australia**  
5  
6  
7  
8

9 **Authors:**

10 Dr Lee Nedkoff,  
11 School of Population and Global Health, The University of Western Australia, Perth, Australia  
12  
13

14 Dr Derrick Lopez,  
15 School of Population and Global Health, The University of Western Australia, Perth, Australia  
16  
17

18 Emeritus Professor Michael Goldacre,  
19 Unit of Health-Care Epidemiology, Nuffield Department of Population Health, University of  
20 Oxford, Oxford, United Kingdom  
21  
22  
23

24 Dr Frank Sanfilippo,  
25 School of Population and Global Health, The University of Western Australia, Perth, Australia  
26  
27

28 Emeritus Professor Michael Hobbs,  
29 School of Population and Global Health, The University of Western Australia, Perth, Australia  
30  
31

32 Dr F. Lucy Wright,  
33 Cancer Epidemiology Unit, Nuffield Department of Population Health, University of Oxford,  
34 Oxford, United Kingdom  
35  
36  
37

38 **Corresponding Author:**

39 Dr Lee Nedkoff,  
40 School of Population and Global Health,  
41 The University of Western Australia  
42 M431, 35 Stirling Hwy, Crawley, Western Australia 6009  
43 Ph: +61 8 6488 8761  
44 E: [lee.nedkoff@uwa.edu.au](mailto:lee.nedkoff@uwa.edu.au)  
45  
46  
47  
48  
49  
50

51 **Word Count** (excl title page, abstract, references, figures/tables): 2993  
52  
53  
54  
55  
56  
57  
58  
59  
60

## ABSTRACT

### Objective:

To determine the utility of International Classification of Diseases (ICD) codes in investigating trends in ST-elevation myocardial infarction (STEMI) and non-ST elevation MI (NSTEMI) using person-linked electronic hospitalisation data in England and Western Australia (WA).

### Methods:

All hospital admissions with myocardial infarction (MI) as the principal diagnosis were identified from 2000 to 2013 from both jurisdictions. 4<sup>th</sup>-digit ICD-10 codes were used to delineate all MI types – STEMI, NSTEMI, unspecified and subsequent MI. The annual frequency of each MI type was calculated as a proportion of all MI admissions. For all MI and each MI type, age-standardised rates were calculated and age-adjusted Poisson regression models used to estimate annual percentage changes in rates.

### Results

In 2000, STEMI accounted for 49% of all MI admissions in England and 59% in WA, decreasing to 35% and 25% respectively by 2013. Less than 10% of admissions were recorded as NSTEMI in England throughout the study period, whereas by 2013, 70% of admissions were NSTEMI in WA. Unspecified MI comprised 60% of all MI admissions in England by 2013, compared with <1% in WA. Trends in age-standardised rates differed for all MI (England, -2.7%/year; WA, +1.7%/year), underpinned by differing age-adjusted trends in NSTEMI (England, -6.1%/year; WA, +10.2%/year).

### Conclusion

Differences between the proportion and trends for MI types in English and WA data were observed. These were consistent with the coding standards in each country. This has important implications for using electronic hospital data for monitoring MI and identifying MI types for outcome studies.

Word count: 249

**Strengths and Limitations of this study:**

- This study uses whole-population electronic hospital data from England and Western Australia (WA) which allowed for identification of all myocardial infarction (MI) hospitalisations in both jurisdictions.
- Data from WA was used because national Australian data is unlinked, and would therefore have overestimated rates and potentially influenced trends. We used proportions and age-standardised rates to make comparisons in MI type and limit the impact of different population size and structure between the jurisdictions.
- We were unable to validate the recording of STEMI and NSTEMI in electronic records against clinical data. However we closely investigated the International Classification of Diseases codes and standards in each jurisdiction which could potentially influence the type of MI recorded.

1  
2  
3  
4  
5  
6  
7  
8  
9  
10  
11  
12  
13  
14  
15  
16  
17  
18  
19  
20  
21  
22  
23  
24  
25  
26  
27  
28  
29  
30  
31  
32  
33  
34  
35  
36  
37  
38  
39  
40  
41  
42  
43  
44  
45  
46  
47  
48  
49  
50  
51  
52  
53  
54  
55  
56  
57  
58  
59  
60

Coronary heart disease (CHD) remains a leading cause of morbidity and mortality in developed countries despite sustained long-term improvements in incidence and case-fatality in recent decades.<sup>1</sup> Population-level studies have historically analysed myocardial infarction (MI) as a single entity, often using routinely collected electronic hospital admission data.<sup>2</sup> Since the late 1990s, MI has been classified clinically as either the more severe ST-segment elevation MI (STEMI), or non-ST-segment elevation MI (NSTEMI). For monitoring and epidemiological studies, it is important to differentiate MI type because of different risk stratification, acute management and outcomes for patients diagnosed with STEMI and NSTEMI.<sup>3</sup>

Administrative data, such as electronic hospital records, are increasingly used in many countries for health research and monitoring of trends in disease including MI and CHD. However it is unclear whether the two clinical MI diagnoses can be accurately identified in such datasets. Research has been impeded by the lack of specific International Classification of Diseases (ICD) codes for STEMI and NSTEMI in the World Health Organization (WHO) version of ICD-10.<sup>4</sup> This has been further complicated by the inclusion of ICD codes for unspecified and subsequent MI in ICD manuals, and different coding standards across jurisdictions. Reports of opposing trends in hospitalisation rates for STEMI and NSTEMI and the use of increasingly sensitive troponin assays have also complicated interpretation of data from electronic hospital records.<sup>5, 6</sup>

Studies using electronic hospital data in England and Australia have shown differences in trends in national hospitalisation rates for all MI. Rates have continued to decline in England,<sup>7</sup> whereas MI rates have plateaued nationally in Australia and Western Australia (WA) since the early-2000s.<sup>8, 9</sup> We are now conducting an international collaborative study of comparative population-level CHD trends between England and Australia. It includes investigation into possible reasons for the observed differences in MI trends and the potential utility of these data sources for investigating MI type. We thus undertook a comparative analysis of trends in proportions and hospitalisation rates of each MI type between English and WA person-linked hospital data from 2000 to 2013.

## METHODS

### Data sources

Person-linked hospitalisation data for all CHD hospital admissions for the English and WA populations were available as part of a larger study comparing trends in CHD subgroups between England and Australia. For the current report, person-linked English hospitalisation data were available from the Hospital Episodes Statistics (HES) dataset which includes all National Health Service hospital admissions for MI. The HES data were supplied by the English Health and Social Care Information Centre and were linked by the Oxford Record Linkage Study team. As national Australian data are unlinked, we elected to use our person-linked WA dataset. This was obtained from the WA Data Linkage System and linked by the WA Data Linkage Branch using probabilistic matching. This dataset contains all MI hospital admissions for the population of WA.

### ICD versions and MI codes

Hospital admissions in England have been coded using the WHO version of ICD-10 since April 1995, and an Australian Modification (ICD-10-AM) has been in use in most Australian states since July 1998, and in WA, since July 1999. The I21 code refers to an acute MI and is most commonly used in epidemiological studies. There has been no specific 4<sup>th</sup>-digit ICD-10 code for STEMI or NSTEMI in the WHO version, although a reference to ‘myocardial infarction with non-ST elevation’ was added to the I21.4 code in 2015.<sup>4</sup> An update in 2004 to ICD-10-AM in Australia contained changes to I21 code descriptors, with “transmural infarction or STEMI” and “subendocardial infarction or NSTEMI” included with the relevant codes.<sup>10</sup> The ICD-10 codes for MI at the 4<sup>th</sup> digit level are described in detail in Supplementary Table 1.

The study period of 2000 to 2013 coincides with the use of STEMI and NSTEMI in clinical practice, and the gradual implementation of coding standards and guidelines for these specific diagnoses in electronic hospital data (Supplementary Methods). The National Clinical Coding Standards used in England during this period required that an MI be coded as unspecified unless transmural or subendocardial damage were recorded (even if STEMI or NSTEMI were detailed in the medical notes).<sup>11, 12</sup> In contrast, since 2004 the Australian Coding Standards indicate that

1  
2  
3 the 4<sup>th</sup>-digit codes for STEMI and NSTEMI can be used if recorded in the medical notes,  
4  
5 irrespective of whether the severity of myocardial damage is noted.  
6

7  
8 The WHO ICD-10 manual states that the code I22.x "...should be assigned for infarction of any  
9 myocardial site, occurring within 4 weeks (28 days) from onset of a previous infarction."<sup>4</sup> In  
10 Australia, coding standards are consistent with this descriptor. In contrast, English coders had  
11 been instructed to assign I22 for an admission if there was documentation of any previous MI in  
12 the patient's medical record, no matter when the preceding MI occurred. This standard was  
13 modified in 2012<sup>12</sup> so that an MI occurring more than 4 weeks after an acute MI is now classified  
14 as I21, thus becoming congruent with the coding standard in Australia.  
15  
16  
17  
18  
19

### 20 21 22 23 **Case Identification**

24  
25 For the current analysis, all hospital records coded as I21 or I22 in the principal diagnosis field  
26 were identified for people aged 35 to 84 years from both datasets. We defined STEMI as I21.0–  
27 I21.3, NSTEMI as I21.4, unspecified MI as I21.9, and subsequent MI as I22. All interhospital  
28 transfers were accounted for by identifying contiguous series of admissions. For example, if a  
29 patient was discharged from one hospital and admitted to another within one day, both  
30 admissions were classified as part of the same hospital stay and counted once. We also created  
31 28-day episodes for each MI type, where any MI readmission occurring within 28-days of an  
32 index MI was classified as part of the index episode. This was to determine whether any  
33 observed differences in proportions and trends in each MI type were impacted by jurisdictional  
34 differences in early discharge and readmission practices. Our analysis showed proportions and  
35 trends in each MI type were consistent with the main results of the study (data not shown).  
36  
37  
38  
39  
40  
41  
42  
43  
44  
45  
46  
47

### 48 **Statistical Analysis**

49  
50 MI type is presented separately for England and WA as proportions of all MI admissions in each  
51 year. Age- and sex-standardised hospitalisation rates were calculated using the direct method for  
52 all MI, and for each MI type, separately for each jurisdiction. The numerator was the number of  
53 admissions for each MI type per year, and the denominator was the sex/5-year age group  
54  
55  
56  
57  
58  
59  
60



1  
2  
3 population number for each of England and WA respectively. NSTEMI and unspecified MI are  
4 often analysed as a combined group in administrative data studies,<sup>13, 14</sup> therefore we also  
5 calculated proportions and rates for NSTEMI/unspecified MI combined to allow comparison  
6 with published data. Rates were standardised by sex and 5-year age group using the 2013  
7 European Standard Population as the standard. Age- and sex- adjusted trends were estimated  
8 from Poisson regression models which included 5-year age group, sex and calendar year  
9 (continuous). Statistical analyses were undertaken using SAS version 9.4.  
10  
11  
12  
13  
14  
15  
16  
17  
18

## 19 RESULTS:

20  
21 From 2000 to 2013, there were 931,057 hospitalisations for all MI in England. In 2000, 49% of  
22 all MI admissions were for STEMI, decreasing to 35% by 2013 (Figure 1). NSTEMI comprised  
23 less than 10% throughout most of the period, apart from a small increase through the mid-2000s.  
24 In contrast, unspecified MI increased from nearly one third of all MI admissions in 2000 to make  
25 up 60% by 2013. Records coded as subsequent MI increased from 13% to 21% of all admissions  
26 in 2011, but decreased to <1% in the last year of the study period.  
27  
28  
29  
30  
31

32 In WA for the same period, there were 41,113 hospital admissions for all MI. STEMI accounted  
33 for 59% in 2000, decreasing to 25% of MI admissions by 2013 (Figure 1). In contrast, NSTEMI  
34 increased from 24% to 73% of all MI admissions by 2013. Unspecified MI was only a small  
35 proportion of cases throughout the study period, decreasing from 16% in 2000, to 1% by 2013.  
36 Subsequent MI was rarely coded in WA data (~1% of admissions annually).  
37  
38  
39  
40  
41

42 NSTEMI and unspecified MI in combination accounted for 37% of all MI admissions in England  
43 and WA in 2000, increasing to 63% and 75% respectively by 2013 (Figure 2). In both England  
44 and WA data, the proportion of cases coded as STEMI was higher in men than women, with  
45 lower proportions of unspecified MI in men than women in both data sources (Supplementary  
46 Figure 1). Trends in the proportion of each MI type were similar between men and women.  
47  
48  
49  
50

51 Age- and sex-standardised rates of all MI admissions were similar between the two data sources  
52 in the first years of the study period (Figure 3). However temporal trends differed, with all MI  
53 declining in England and increasing slightly in WA (Table 1). Rates of STEMI were higher in  
54 WA than England at the beginning of the period (173/100,000 versus 139/100,000 person-years)  
55  
56  
57  
58  
59  
60

however rates declined in both jurisdictions to ~80/100,000 in 2013. The significant increase in NSTEMI and decline in unspecified MI rates in WA was converse to that seen in the English data. Rates of subsequent MI were <5/100,000 person-years throughout the period in WA, in contrast to an average of ~ 40/100,000 person-years in England. The exception was a sharp downturn in rates of subsequent MI in England in 2012, declining from 43/100,000 person-years to 1/100,000 person-years by 2013, with concomitant increases in STEMI and unspecified MI rates.

Table 1. Age- and sex-adjusted trends in all myocardial infarction, and myocardial infarction types, in England and Western Australia, based on International Classification of Diseases coding.

|                | Average annual % change (95% confidence interval) |                           |
|----------------|---------------------------------------------------|---------------------------|
|                | England                                           | Western Australia         |
| STEMI          | -6.5% (-6.6, -6.4)                                | -5.5 (-5.9, -5.1)         |
| NSTEMI         | -6.1% (-6.2, -5.9)                                | +10.2 (+9.8, +10.6)       |
| Unspecified MI | +2.8 (+2.7, +2.9)                                 | -15.9 (-16.7, -15.0)      |
| Subsequent MI  | -4.6 (-4.7, -4.5)                                 | -2.2 (-5.0, +0.6)         |
| <b>All MI</b>  | <b>-2.7 (-2.8, -2.6)</b>                          | <b>+1.7% (+1.4, +1.9)</b> |

STEMI, ST-elevation myocardial infarction; NSTEMI, non-ST-elevation myocardial infarction; MI, myocardial infarction.

## DISCUSSION

We found differences in temporal trends of admissions for all MI and some MI types identified from English and WA whole-population electronic hospital data from 2000 to 2013. In England, rates of total MI declined while there was a slight increase in rates in WA. Using the 4<sup>th</sup>-digit ICD-10 code to identify MI types produced low rates and proportions of NSTEMI admissions in English data, which differed significantly from WA data. Unspecified MI and subsequent MI have been more frequently coded in England compared with WA. In contrast, the proportion of admissions and age-adjusted trends in rates of STEMI are similar between the two data sources despite differences in coding standards.

### Identification of STEMI and NSTEMI using ICD-10 codes

The proportion of all MI admissions comprised of STEMI and decline in rates was similar in both jurisdictions and consistent with trends in other studies.<sup>6</sup> In contrast, there was a very low proportion and no upward trend in rates of NSTEMI admissions in England. This is inconsistent with registry studies, including the Myocardial Ischaemia National Audit Project (MINAP) in England, where the overall proportion of NSTEMI cases in 2003-2010 was 51%.<sup>15</sup> The increasing proportions of NSTEMI and decreasing STEMI admissions in the WA data corresponds with the coding standards in place and data from clinical registries in Australia.<sup>16</sup> The high proportion of MI admissions recorded as unspecified in the English national hospitalisation data is congruent with the English coding standards in place during the study period, which are likely to have facilitated the coding of unspecified MI instead of NSTEMI and STEMI, although the pattern in NSTEMI admissions likely indicates a greater misclassification in this group.

Aggregation of NSTEMI and unspecified MI is an approach used previously in electronic hospital data studies as a means of accounting for unspecified MI admissions.<sup>17</sup> Previous validation of a sample of MI cases found unspecified MI to be more closely aligned with NSTEMI<sup>14</sup> although this has not been formally tested in English and Australian data. Using this method with the English data produced a temporal pattern for NSTEMI more compatible with observed proportions and trends in WA and elsewhere. However, because of the coding standards, there is still likely misclassification of an unknown proportion of STEMI cases into this grouping, and the coding of STEMI and NSTEMI admissions as non-specific subsequent MI further complicates interpretation.

Despite the increasing number of studies using ICD codes to stratify MI by ST-elevation status, there is limited validation of the ICD codes which nominally indicate STEMI or NSTEMI. Additionally, coding standards and guidelines for their application relevant to the dataset are often not reported. While positive predictive value (PPV) for the recording of MI overall in electronic hospital data is reasonably high (~90% in England,<sup>18</sup> 85% in WA<sup>19</sup>), data from the Kaiser Permanente database in the US reported different PPV for STEMI and NSTEMI cases (79% and 91% respectively, based on ICD-9-CM codes).<sup>14</sup> Similar differences in PPV between STEMI and NSTEMI were reported from an Australian case review using both ICD-9-CM and

1  
2  
3 ICD-10-AM codes.<sup>20</sup> Descriptors for STEMI and NSTEMI were added to the transmural and  
4 subendocardial MI codes in ICD-9-CM in the US in 2005,<sup>21</sup> but were rarely included in this ICD  
5 version in other jurisdictions including Australia.  
6  
7

### 8 9 **Comparisons of trends**

10  
11 There are an increasing number of studies reporting temporal trends in rates of STEMI and  
12 NSTEMI using electronic health data. The US Kaiser Permanente study, and Irish and German  
13 national administrative data studies report consistently significant reductions in rates of STEMI  
14 since the late 1990s.<sup>14, 17, 22</sup> Results from community-based studies using medical notes to  
15 classify MI types in the US, including the Atherosclerosis Risk in Communities (ARIC) and  
16 Olmsted County studies, support these findings, and highlight reductions in STEMI as being  
17 independent of the introduction of troponin.<sup>5, 6</sup> In our study, trends in STEMI hospitalisation  
18 rates in England and WA are consistent with these reports.  
19  
20  
21  
22  
23  
24  
25

26  
27 Population-level trends in NSTEMI are less consistent across studies. The ARIC study found no  
28 significant change in rates of first NSTEMI from 1997 to 2008,<sup>5</sup> in contrast to increasing rates in  
29 Olmsted County,<sup>6</sup> Ireland<sup>17</sup> and small increases in rates in Germany.<sup>22</sup> The marked difference in  
30 NSTEMI rates and trends between England and WA in the current report add to these  
31 inconsistencies. Variations in troponin assay sensitivity and implementation of diagnostic  
32 guidelines for MI could contribute to these differences, and the magnitude of upward trend in  
33 NSTEMI rates in Australia appears significantly greater than in other jurisdictions. In England,  
34 variation in the actual recording of NSTEMI diagnoses at the hospital level has been reported,<sup>23</sup>  
35 and combined with coding standards which until recently promoted recording of unspecified MI,  
36 are likely major contributors to the low NSTEMI rates in English national data.  
37  
38  
39  
40  
41  
42  
43  
44  
45  
46  
47

### 48 **Implications**

49  
50 Our results have implications for the use of ICD codes in identifying MI type from electronic  
51 hospital data. The coding standards in place in England until 2015 suggest that English electronic  
52 hospital data are unlikely to be reliable for differentiating STEMI and NSTEMI admissions. In  
53 particular, it is unlikely that the 4<sup>th</sup> digit codes for NSTEMI can be reliably used for population-  
54 level temporal trend analyses or in followup studies for defined patient cohorts in England  
55  
56  
57  
58  
59  
60

1  
2  
3 without adjudication of diagnoses from medical notes. Conversely, the large increase in  
4 NSTEMI rates and cumulative increase in all MI rates in WA differs from many studies from  
5 other countries, where trends in MI rates have continued downward, despite the effect of  
6 troponin testing.<sup>24, 25</sup> This necessitates some caution in the use of ICD-10 codes for reporting  
7 temporal trends in NSTEMI in Australia using electronic hospital data, although the proportion  
8 of MI comprised of NSTEMI in contemporary data is consistent with that in ACS registries.<sup>26</sup>  
9  
10  
11  
12  
13

14 Our results are also of relevance for population monitoring of incidence and hospitalisation rates  
15 of all MI. In England there is high concordance between electronic hospital records and general  
16 practice datasets for the recording of total MI (I21, I22)<sup>27</sup> and similarly in Australia, thus  
17 indicating that these data remain a reliable and pragmatic means of monitoring rates of all MI in  
18 the population. In terms of identifying incidence (first-ever cases), the coding standard for  
19 subsequent MIs in place in England up until 2012 is unlikely to have ensured accurate  
20 identification of all first-ever MIs as coders would not always have had access to all hospital  
21 records and medical history for a patient. The use of linked datasets using hospital data alone or  
22 multiple sources therefore remains a necessary mainstay of monitoring MI incidence.  
23  
24  
25  
26  
27  
28  
29  
30  
31  
32  
33

### 34 **Strengths and Limitations**

35  
36 The large number of admissions in both datasets allowed examination of each coded MI type  
37 annually over a relevant extended period. Although population sizes differ, the use of  
38 proportions and age-standardised rates allowed for comparison between the two jurisdictions.  
39 Although we were aware of the coding standards in place in each jurisdiction, there can be local  
40 differences in instructions to coders and application of standards which could affect the results.  
41 The WA results in the current study are likely to be generalisable nationally, as the coding  
42 standards described here are applied nationally, and the Australian Institute of Health and  
43 Welfare have reported national MI trends and rates of the subsequent MI code using unlinked  
44 data which support the WA results in our study.<sup>8</sup> We were unable to validate the recording of  
45 STEMI and NSTEMI in administrative data against clinical data for the purpose of this analysis.  
46 In WA, we are currently pursuing this using a random sample of MI cases to compare medical  
47 records and ECG findings against recording of the 4<sup>th</sup>-digit ICD code for MI type in electronic  
48 hospital data. As national hospitalisation data in Australia are unlinked, WA linked data was  
49  
50  
51  
52  
53  
54  
55  
56  
57  
58  
59  
60

1  
2  
3 used for the current study, thus removing double counting of events due to inter-hospital transfer,  
4 and allowing direct comparison with English linked data  
5  
6  
7  
8  
9

## 10 **Conclusions**

11  
12 Understanding population-level trends in MI remains an important component of monitoring the  
13 effectiveness of management and prevention of CHD. Electronic health data are a pragmatic  
14 means of collecting information and reporting trends for MI. However, our results highlight the  
15 necessity for understanding coding standards when using specific codes such as MI type from  
16 administrative data, and call into question the accuracy of 4<sup>th</sup>-digit ICD codes to identify STEMI  
17 and NSTEMI for use in monitoring and follow-up studies across jurisdictions. The use of such  
18 codes should be investigated in each jurisdiction prior to widespread use for monitoring and  
19 analyses of outcomes. Changes in clinical classification and practice such as have occurred with  
20 MI are not always reflected in ICD codes or standards in a timely manner, and our results  
21 highlight the potential for wide variation in the use of such codes in different jurisdictions.  
22  
23  
24  
25  
26  
27  
28  
29  
30  
31  
32

33 **Funding:** This work was supported by the National Health and Medical Research Council of  
34 Australia (NHMRC) and a Research Collaboration Award from The University of Western  
35 Australia.  
36  
37  
38

39 **Acknowledgements:** The authors wish to thank the staff at the Western Australian Data Linkage  
40 Branch, the Department of Health Inpatient Data Collections and Registrar General; and staff at  
41 Unit of Health-Care Epidemiology, Nuffield Department of Population Health, University of  
42 Oxford. LN is supported by a NHMRC Early Career Fellowship.  
43  
44  
45  
46  
47

48 **Contributors:** LN and FLW conceived the study; LN carried out the data analysis and wrote the  
49 manuscript; LN, FLW, DL, FS, MG, and MH reviewed the data, provided interpretation and  
50 critical revisions, and reviewed all drafts of the manuscript.  
51  
52  
53  
54

55 **Competing Interests:** None declared  
56  
57  
58  
59  
60

1  
2  
3  
4  
5  
6  
7  
8  
9  
10  
11  
12  
13  
14  
15  
16  
17  
18  
19  
20  
21  
22  
23  
24  
25  
26  
27  
28  
29  
30  
31  
32  
33  
34  
35  
36  
37  
38  
39  
40  
41  
42  
43  
44  
45  
46  
47  
48  
49  
50  
51  
52  
53  
54  
55  
56  
57  
58  
59  
60

**Data sharing statement:** No additional data are available.

**Ethics Approvals:** WA Department of Health and UWA Human Research Ethics Committee

For peer review only

1  
2  
3  
4  
5  
6  
7  
8  
9  
10  
11  
12  
13  
14  
15  
16  
17  
18  
19  
20  
21  
22  
23  
24  
25  
26  
27  
28  
29  
30  
31  
32  
33  
34  
35  
36  
37  
38  
39  
40  
41  
42  
43  
44  
45  
46  
47  
48  
49  
50  
51  
52  
53  
54  
55  
56  
57  
58  
59  
60  
**REFERENCES**

1. World Health Organization. The top 10 causes of death. 2014 [cited 2015 01 July ]. Available from: <http://www.who.int/mediacentre/factsheets/fs310/en/>
2. Beaglehole R, Stewart AW, Jackson R, et al. Declining rates of coronary heart disease in New Zealand and Australia, 1983-1993. *Am J Epidemiol* 1997;145(8):707-713.
3. Chew DP, Scott IA, Cullen L, et al. National Heart Foundation of Australia and Cardiac Society of Australia and New Zealand: Australian clinical guidelines for the management of acute coronary syndromes 2016. *Med J Aust* 2016;205(3):128-133.
4. World Health Organization. International Statistical Classification of Diseases and Related Health Problems 10th revision (ICD-10)-2015. 2015. Available from: <http://apps.who.int/classifications/icd10/browse/2015/en#/I20-I25>
5. Rosamond WD, Chambless LE, Heiss G, et al. Twenty-two-year trends in incidence of myocardial infarction, coronary heart disease mortality, and case fatality in 4 US communities, 1987–2008. *Circulation* 2012 April 17, 2012;125(15):1848-1857.
6. Roger VL, Weston SA, Gerber Y, et al. Trends in incidence, severity, and outcome of hospitalized myocardial infarction. *Circulation* 2010;121(7):863-869.
7. Smolina K, Wright FL, Rayner M, et al. Determinants of the decline in mortality from acute myocardial infarction in England between 2002 and 2010: linked national database study. *BMJ* 2012;344:d8059.
8. Australian Institute of Health and Welfare. Monitoring acute coronary syndrome using national hospital data: an information paper on trends and issues. Canberra; 2011. Report No.: Cat. no. CVD 57. .
9. Nedkoff L, Knuiman M, Hung J, et al. Comparative trends in the incidence of hospitalized myocardial infarction and coronary heart disease in adults with and without diabetes mellitus in Western Australia from 1998 to 2010. *Circ Cardiovasc Qual Outcomes* 2014;7(5):708-717.
10. National Centre for Classification in Health. The International Statistical Classification of Diseases and related health problems, tenth revision, Australian modification (ICD-10-AM): tabular list. Seventh ed. University of Sydney: National Centre for Classification in Health; 2004.
11. Health & Social Care Information Centre. Clinical Coding Instruction Manual ICD-10 version 2.0. 2007.
12. Health & Social Care Information Centre. National Clinical Coding Standards ICD-10 4th Edition. 2012.
13. Yin W-H, Lu T-H, Chen K-C, et al. The temporal trends of incidence, treatment, and in-hospital mortality of acute myocardial infarction over 15 years in a Taiwanese population. *Int J Cardiol* 2016;209:103-113.



14. Yeh RW, Sidney S, Chandra M, et al. Population trends in the incidence and outcomes of acute myocardial infarction. *N Engl J Med* 2010 June 10, 2010;362(23):2155-2165.
15. Butland BK, Atkinson RW, Milojevic A, et al. Myocardial infarction, ST-elevation and non-ST-elevation myocardial infarction and modelled daily pollution concentrations: a case-crossover analysis of MINAP data. *OpenHeart* 2016;3:e000429.doi:10.1136/openhrt-2016-000429.
16. Chew DP, French J, Briffa TG, et al. Acute coronary syndrome care across Australia and New Zealand: the SNAPSHOT ACS study. *Med J Aust* 2013;199:1-7.
17. Jennings SM, Bennett K, Lonergan M, et al. Trends in hospitalisation for acute myocardial infarction in Ireland, 1997-2008. *Heart* 2012;98(17):1285-1289.
18. Herrett E, Shah AD, Boggon R, et al. Completeness and diagnostic validity of recording acute myocardial infarction events in primary care, hospital care, disease registry, and national mortality records: cohort study. *BMJ* 2013;346:f2350.
19. Sanfilippo FM, Hobbs MST, Knuiman MW, et al. Can we monitor heart attack in the troponin era: evidence from a population-based cohort study. *BMC Cardiovasc Disord* 2011;11:35.
20. Wong CX, Sun MT, Lau DH, et al. Nationwide trends in the incidence of acute myocardial infarction in Australia, 1993-2010. *Am J Cardiol* 2013;112:169-173.
21. Cannon CP. Update to International Classification of Diseases, 9th revision codes: distinguishes STEMI from NSTEMI. *Crit Pathw Cardiol* 2005;4:185-186.
22. Freisinger E, Fuerstenber T, Malyar NM, et al. German nationwide data on current trends and management of acute myocardial infarction: discrepancies between trials and real-life. *Eur H J* 2014;35:979-988.
23. Herrett E, Smeeth L, Walker L, et al, on behalf of the MINAP Academic Group. The Myocardial Ischaemia National Audit Project (MINAP). *Heart* 2010;96:1264-1267.
24. Sulo G, Igland J, Nygård O, et al. Favourable trends in incidence of AMI in Norway during 2001-2009 do not include younger adults: a CVDNOR project. *Eur J Prev Cardiol* 2013;21(11):1358-1364.
25. Koopman C, Bots ML, van Dis I, et al. Shifts in the age distribution and from acute to chronic coronary heart disease hospitalizations. *Eur J Prev Cardiol* 2016;23(2):170-177.
26. Chung S-C, Gedeberg R, Nicholas O, et al. Acute myocardial infarction: a comparison of short-term survival in national outcome registries in Sweden and the UK. *Lancet* 2014;383(9925):1305-1312.
27. Wright FL, Green J, Canoy D, et al. Vascular disease in women: comparison of diagnoses in hospital episode statistics and general practice records in England. *BMC Med Res Methodol* 2012;12:161.

**Figure legends:**

Figure 1. Types of myocardial infarction as a proportion of all myocardial infarction admissions, from (A) linked English hospitalisation data and (B) linked Western Australian hospitalisation data. *STEMI*, *ST-elevation myocardial infarction*; *NSTEMI*, *non-ST-elevation myocardial infarction*; *MI*, *myocardial infarction*.

Figure 2. Types of myocardial infarction as a proportion of MI admissions, with NSTEMI and unspecified MI cases aggregated, from (A) linked English hospitalisation data and (B) linked Western Australian hospitalisation data. *STEMI*, *ST-elevation myocardial infarction*; *NSTEMI*, *non-ST-elevation myocardial infarction*; *MI*, *myocardial infarction*.

Figure 3. Age- and sex-standardised rates of all myocardial infarction, and myocardial infarction types, based on International Classification of Diseases codes, from (A) linked English national hospitalisation data, and (B) linked Western Australian hospitalisation data. *STEMI*, *ST-elevation myocardial infarction*; *NSTEMI*, *non-ST-elevation myocardial infarction*; *MI*, *myocardial infarction*.

Supplementary Figure 1. Proportion of each myocardial infarction type as a proportion of all myocardial infarction admissions stratified by sex, from linked English hospitalisation data for (A) men and (B) women, and linked Western Australian hospitalisation data for (C) men and (D) women.

1  
2  
3  
4  
5  
6  
7  
8  
9  
10  
11  
12  
13  
14  
15  
16  
17  
18  
19  
20  
21  
22  
23  
24  
25  
26  
27  
28  
29  
30  
31  
32  
33  
34  
35  
36  
37  
38  
39  
40  
41  
42  
43  
44  
45  
46  
47  
48  
49  
50  
51  
52  
53  
54  
55  
56  
57  
58  
59  
60

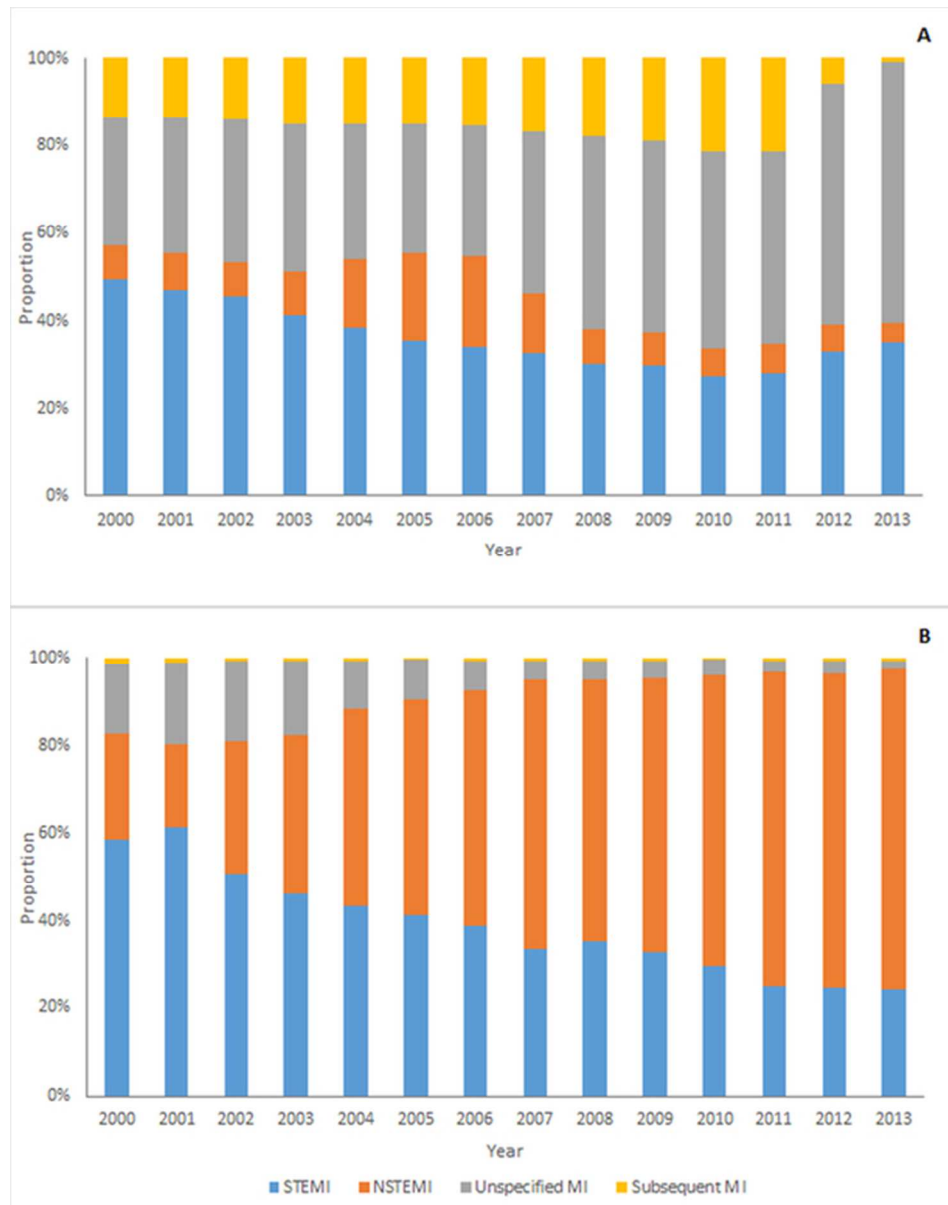

Figure 1

25x32mm (600 x 600 DPI)

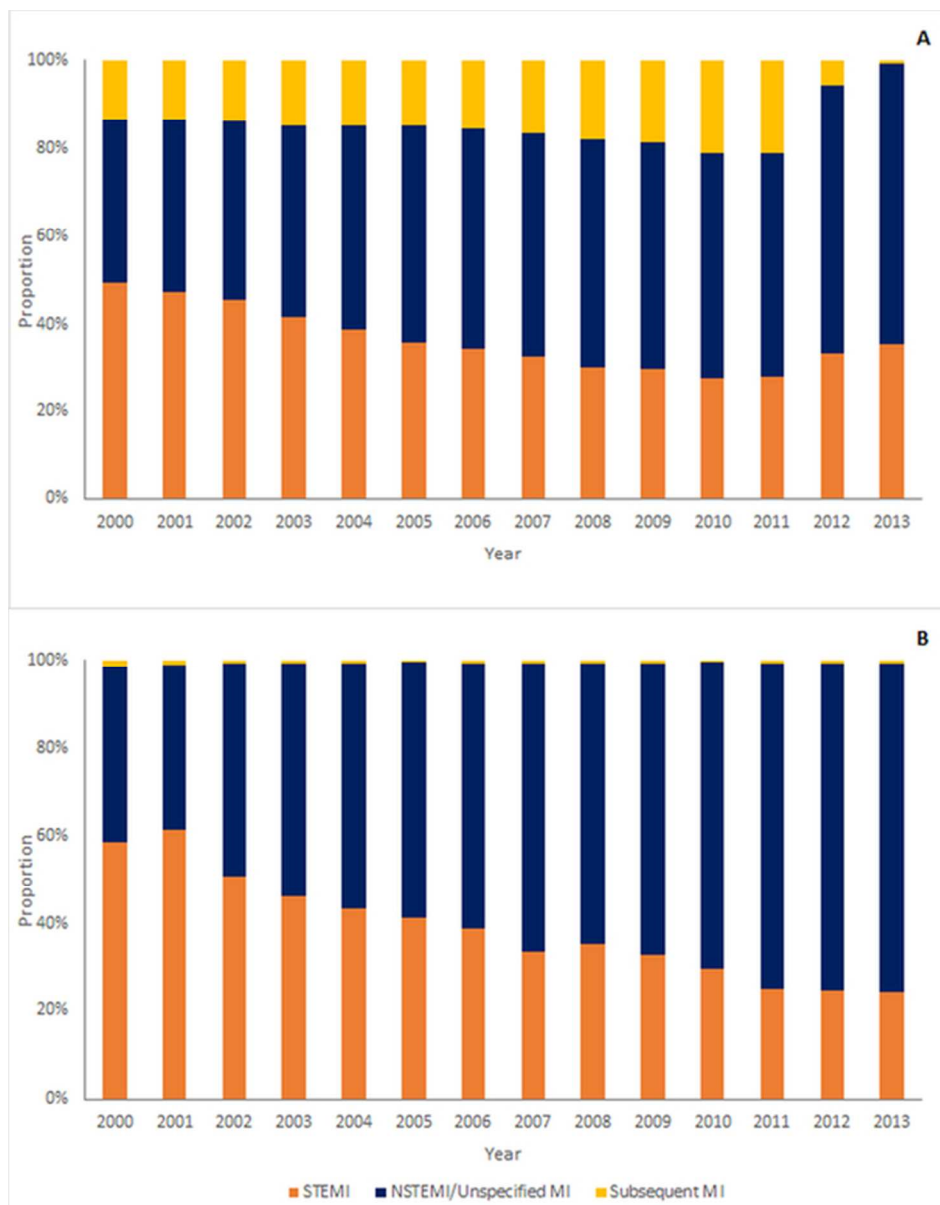

Figure 2

25x32mm (600 x 600 DPI)

1  
2  
3  
4  
5  
6  
7  
8  
9  
10  
11  
12  
13  
14  
15  
16  
17  
18  
19  
20  
21  
22  
23  
24  
25  
26  
27  
28  
29  
30  
31  
32  
33  
34  
35  
36  
37  
38  
39  
40  
41  
42  
43  
44  
45  
46  
47  
48  
49  
50  
51  
52  
53  
54  
55  
56  
57  
58  
59  
60

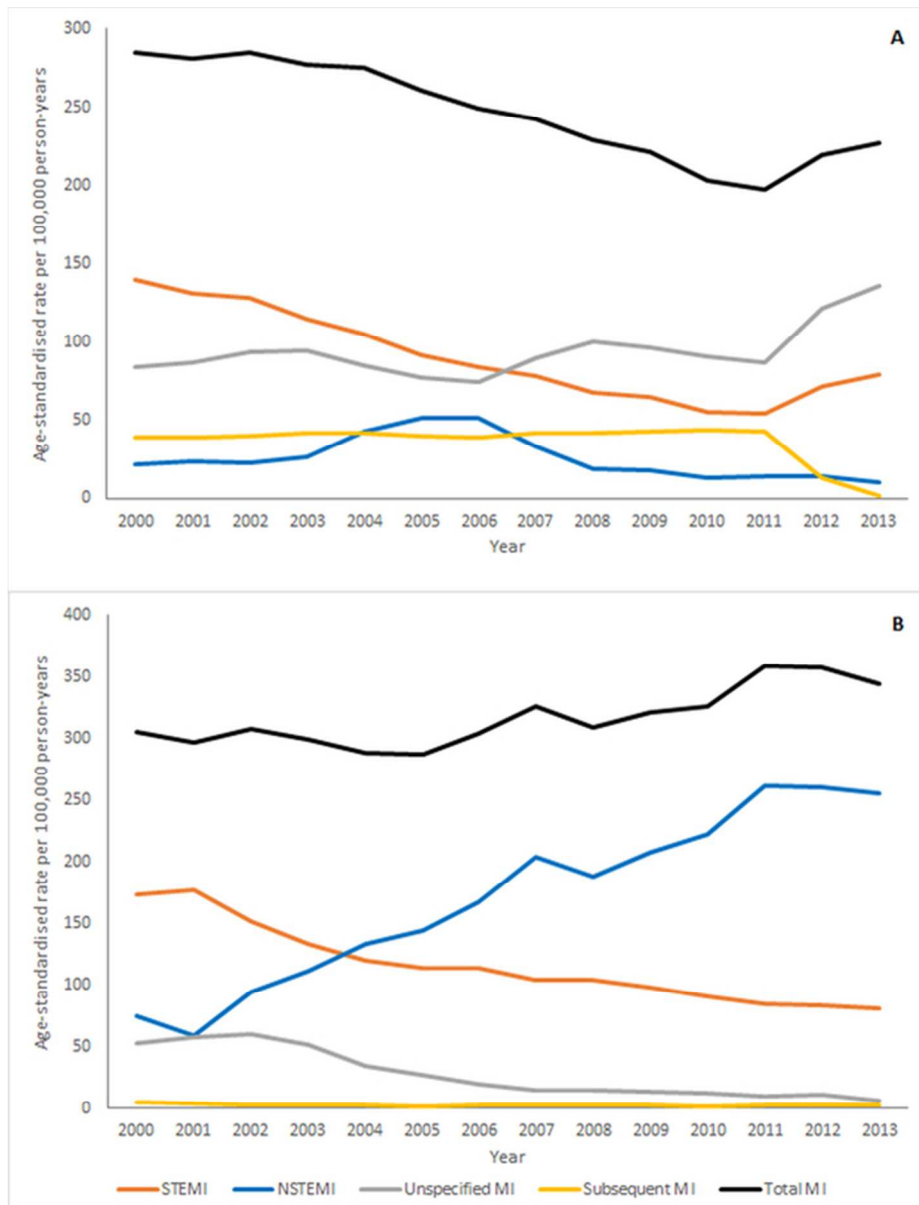

Figure 3

26x34mm (600 x 600 DPI)

1  
2  
3  
4  
5  
6  
7  
8  
9  
10  
11  
12  
13  
14  
15  
16  
17  
18  
19  
20  
21  
22  
23  
24  
25  
26  
27  
28  
29  
30  
31  
32  
33  
34  
35  
36  
37  
38  
39  
40  
41  
42  
43  
44  
45  
46  
47  
48  
49  
50  
51  
52  
53  
54  
55  
56  
57  
58  
59  
60

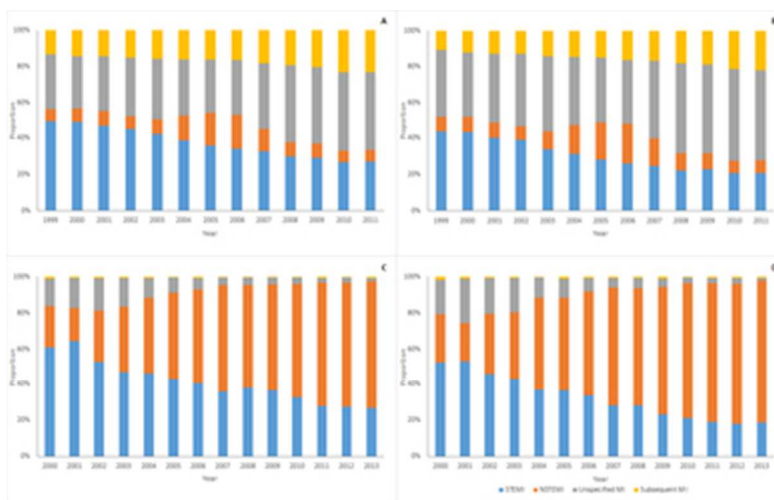

Supplementary figure 1

16x10mm (600 x 600 DPI)

**Supplementary Table 1.**

WHO International Classification of Diseases, 10<sup>th</sup> revision (ICD-10) codes for acute and subsequent myocardial infarction (MI) and study classification of MI type.

| ICD-10 code | Description                                        | Study classification |
|-------------|----------------------------------------------------|----------------------|
| <b>I21</b>  | <b>Acute transmural MI of:</b>                     |                      |
| I21.0       | anterior wall                                      | STEMI                |
| I21.1       | inferior wall,                                     |                      |
| I21.2       | other sites                                        |                      |
| I21.3       | unspecified site                                   |                      |
| I21.4       | acute subendocardial MI/<br>acute nontransmural MI | NSTEMI               |
| I21.9       | acute MI, unspecified                              | Unspecified MI       |
| <b>I22</b>  | <b>Subsequent MI of:</b>                           | Subsequent MI        |
| I22.0       | anterior wall                                      |                      |
| I22.1       | inferior wall                                      |                      |
| I22.8       | other sites                                        |                      |
| I22.9       | unspecified site                                   |                      |

**Supplementary Methods:****Standards for the coding of myocardial infarction in England and Australia**

Prior to 2007, medical record coders in England were directed to assign the 4<sup>th</sup>-digit code for I21 based on the extent of damage to the myocardial wall (transmural or subendocardial). Updated directives in 2007 noted continuation of these standards, with an additional statement that unspecified MI should be recorded if the extent of myocardial damage was not stated, even where STEMI or NSTEMI were mentioned in the patient record.<sup>11</sup> These standards remained in place through subsequent updates until 2014, when the National Clinical Coding Standards, 4<sup>th</sup> edition, introduced the first specific instructions to code STEMI (I21.0-I21.3) or NSTEMI (I21.4) irrespective of whether degree of myocardial damage is noted.

1  
2  
3 In Australia prior to 2004, there were no specific instructions for the coding of STEMI or  
4 NSTEMI, rather coding was based on the use of the codes for transmural or subendocardial  
5 infarction. Following the introduction of STEMI and NSTEMI into ICD-10-AM in 2004,  
6  
7 coders have been instructed that I21.0-I21.3 (depending on infarct location) should be coded  
8 if STEMI is recorded as the discharge diagnosis, and I21.4 if NSTEMI is recorded.<sup>10</sup> These  
9 standards have remained in place in subsequent editions of ICD-10-AM.  
10  
11  
12  
13  
14  
15  
16  
17  
18  
19  
20  
21  
22  
23  
24  
25  
26  
27  
28  
29  
30  
31  
32  
33  
34  
35  
36  
37  
38  
39  
40  
41  
42  
43  
44  
45  
46  
47  
48  
49  
50  
51  
52  
53  
54  
55  
56  
57  
58  
59  
60



# BMJ Open

## Identification of myocardial infarction type from electronic hospital data in England and Australia: a comparative data linkage study

|                                 |                                                                                                                                                                                                                                                                                                                                                                                                                                                                                                                                              |
|---------------------------------|----------------------------------------------------------------------------------------------------------------------------------------------------------------------------------------------------------------------------------------------------------------------------------------------------------------------------------------------------------------------------------------------------------------------------------------------------------------------------------------------------------------------------------------------|
| Journal:                        | <i>BMJ Open</i>                                                                                                                                                                                                                                                                                                                                                                                                                                                                                                                              |
| Manuscript ID                   | bmjopen-2017-019217.R1                                                                                                                                                                                                                                                                                                                                                                                                                                                                                                                       |
| Article Type:                   | Research                                                                                                                                                                                                                                                                                                                                                                                                                                                                                                                                     |
| Date Submitted by the Author:   | 24-Sep-2017                                                                                                                                                                                                                                                                                                                                                                                                                                                                                                                                  |
| Complete List of Authors:       | Nedkoff, Lee; University of Western Australia, School of Population and Global Health<br>Lopez, Derrick; University of Western Australia, School of Population and Global Health<br>Goldacre, Michael; University of Oxford, Unit of Health-Care Epidemiology, Department of Public Health<br>Sanfilippo, Frank; The University of Western Australia, School of Population and Global Health<br>Hobbs, Michael; University of Western Australia, School of Population and Global Health<br>Wright, Lucy; University of Oxford, Public Health |
| <b>Primary Subject Heading</b>: | Epidemiology                                                                                                                                                                                                                                                                                                                                                                                                                                                                                                                                 |
| Secondary Subject Heading:      | Cardiovascular medicine, Epidemiology                                                                                                                                                                                                                                                                                                                                                                                                                                                                                                        |
| Keywords:                       | Myocardial infarction < CARDIOLOGY, Cardiac Epidemiology < CARDIOLOGY, STATISTICS & RESEARCH METHODS                                                                                                                                                                                                                                                                                                                                                                                                                                         |
|                                 |                                                                                                                                                                                                                                                                                                                                                                                                                                                                                                                                              |

SCHOLARONE™  
Manuscripts

1  
2  
3 **Identification of myocardial infarction type from electronic hospital data in England and**  
4 **Australia: a comparative data linkage study.**  
5  
6  
7

8  
9 **Authors:**

10 Dr Lee Nedkoff,  
11 School of Population and Global Health, The University of Western Australia, Perth, Australia  
12  
13

14  
15 Dr Derrick Lopez,  
16 School of Population and Global Health, The University of Western Australia, Perth, Australia  
17  
18

19 Emeritus Professor Michael Goldacre,  
20 Unit of Health-Care Epidemiology, Nuffield Department of Population Health, University of  
21 Oxford, Oxford, United Kingdom  
22  
23

24  
25 Dr Frank Sanfilippo,  
26 School of Population and Global Health, The University of Western Australia, Perth, Australia  
27  
28

29 Emeritus Professor Michael Hobbs,  
30 School of Population and Global Health, The University of Western Australia, Perth, Australia  
31  
32

33 Dr F. Lucy Wright,  
34 Cancer Epidemiology Unit, Nuffield Department of Population Health, University of Oxford,  
35 Oxford, United Kingdom  
36  
37

38  
39 **Corresponding Author:**

40 Dr Lee Nedkoff,  
41 School of Population and Global Health,  
42 The University of Western Australia  
43 M431, 35 Stirling Hwy, Crawley, Western Australia 6009  
44 Ph: +61 8 6488 8761  
45 E: [lee.nedkoff@uwa.edu.au](mailto:lee.nedkoff@uwa.edu.au)  
46  
47  
48

49  
50  
51 **Word Count** (excl title page, abstract, references, figures/tables): 2993  
52  
53  
54  
55  
56  
57  
58  
59  
60

## ABSTRACT

### Objective:

To determine the utility of International Classification of Diseases (ICD) codes in investigating trends in ST-elevation myocardial infarction (STEMI) and non-ST elevation MI (NSTEMI) using person-linked electronic hospitalisation data in England and Western Australia (WA).

### Methods:

All hospital admissions with myocardial infarction (MI) as the principal diagnosis were identified from 2000 to 2013 from both jurisdictions. 4<sup>th</sup>-digit ICD-10 codes were used to delineate all MI types – STEMI, NSTEMI, unspecified and subsequent MI. The annual frequency of each MI type was calculated as a proportion of all MI admissions. For all MI and each MI type, age-standardised rates were calculated and age-adjusted Poisson regression models used to estimate annual percentage changes in rates.

### Results

In 2000, STEMI accounted for 49% of all MI admissions in England and 59% in WA, decreasing to 35% and 25% respectively by 2013. Less than 10% of admissions were recorded as NSTEMI in England throughout the study period, whereas by 2013, 70% of admissions were NSTEMI in WA. Unspecified MI comprised 60% of all MI admissions in England by 2013, compared with <1% in WA. Trends in age-standardised rates differed for all MI (England, -2.7%/year; WA, +1.7%/year), underpinned by differing age-adjusted trends in NSTEMI (England, -6.1%/year; WA, +10.2%/year).

### Conclusion

Differences between the proportion and trends for MI types in English and WA data were observed. These were consistent with the coding standards in each country. This has important implications for using electronic hospital data for monitoring MI and identifying MI types for outcome studies.

Word count: 249

**Strengths and Limitations of this study:**

- This study uses whole-population electronic hospital data from England and Western Australia (WA) which allowed for identification of all myocardial infarction (MI) hospitalisations in both jurisdictions.
- Data from WA was used because national Australian data is unlinked, and would therefore have overestimated rates and potentially influenced trends. We used proportions and age-standardised rates to make comparisons in MI type and limit the impact of different population size and structure between the jurisdictions.
- We were unable to validate the recording of STEMI and NSTEMI in electronic records against clinical data. However we closely investigated the International Classification of Diseases codes and standards in each jurisdiction which could potentially influence the type of MI recorded.

1  
2  
3  
4  
5  
6  
7  
8  
9  
10  
11  
12  
13  
14  
15  
16  
17  
18  
19  
20  
21  
22  
23  
24  
25  
26  
27  
28  
29  
30  
31  
32  
33  
34  
35  
36  
37  
38  
39  
40  
41  
42  
43  
44  
45  
46  
47  
48  
49  
50  
51  
52  
53  
54  
55  
56  
57  
58  
59  
60

Coronary heart disease (CHD) remains a leading cause of morbidity and mortality in developed countries despite sustained long-term improvements in incidence and case-fatality in recent decades.<sup>1</sup> Population-level studies have historically analysed myocardial infarction (MI) as a single entity, often using routinely collected electronic hospital admission data.<sup>2</sup> Since the late 1990s, MI has been classified clinically as either the more severe ST-segment elevation MI (STEMI), or non-ST-segment elevation MI (NSTEMI). For monitoring and epidemiological studies, it is important to differentiate MI type because of different risk stratification, acute management and outcomes for patients diagnosed with STEMI and NSTEMI.<sup>3</sup>

Administrative data, such as electronic hospital records, are increasingly used in many countries for health research and monitoring of trends in disease including MI and CHD. However it is unclear whether the two clinical MI diagnoses can be accurately identified in such datasets. Research has been impeded by the lack of specific International Classification of Diseases (ICD) codes for STEMI and NSTEMI in the World Health Organization (WHO) version of ICD-10.<sup>4</sup> This has been further complicated by the inclusion of ICD codes for unspecified and subsequent MI in ICD manuals, and different coding standards across jurisdictions. Reports of opposing trends in hospitalisation rates for STEMI and NSTEMI and the use of increasingly sensitive troponin assays have also complicated interpretation of data from electronic hospital records.<sup>5, 6</sup>

Studies using electronic hospital data in England and Australia have shown differences in trends in national hospitalisation rates for all MI. Rates have continued to decline in England,<sup>7</sup> whereas MI rates have plateaued nationally in Australia and Western Australia (WA) since the early-2000s.<sup>8, 9</sup> We are now conducting an international collaborative study of comparative population-level CHD trends between England and Australia. It includes investigation into possible reasons for the observed differences in MI trends and the potential utility of these data sources for investigating MI type. We thus undertook a comparative analysis of trends in proportions and hospitalisation rates of each MI type between English and WA person-linked hospital data from 2000 to 2013.

## METHODS

### Data sources

Person-linked hospitalisation data for all CHD hospital admissions for the English and WA populations were available as part of a larger study comparing trends in CHD subgroups between England and Australia. For the current report, person-linked English hospitalisation data were available from the Hospital Episodes Statistics (HES) dataset which includes all National Health Service hospital admissions for MI. The HES data were supplied by the English Health and Social Care Information Centre and were linked by the Oxford Record Linkage Study team. As national Australian data are unlinked, we elected to use our person-linked WA dataset. This was obtained from the WA Data Linkage System and linked by the WA Data Linkage Branch using probabilistic matching. This dataset contains all MI hospital admissions for the population of WA.

### ICD versions and MI codes

Hospital admissions in England have been coded using the WHO version of ICD-10 since April 1995, and an Australian Modification (ICD-10-AM) has been in use in most Australian states since July 1998, and in WA, since July 1999. The I21 code refers to an acute MI and is most commonly used in epidemiological studies. There has been no specific 4<sup>th</sup>-digit ICD-10 code for STEMI or NSTEMI in the WHO version, although a reference to ‘myocardial infarction with non-ST elevation’ was added to the I21.4 code in 2015.<sup>4</sup> An update in 2004 to ICD-10-AM in Australia contained changes to I21 code descriptors, with “transmural infarction or STEMI” and “subendocardial infarction or NSTEMI” included with the relevant codes.<sup>10</sup> The ICD-10 codes for MI at the 4<sup>th</sup> digit level are described in detail in Supplementary Table 1.

The study period of 2000 to 2013 coincides with the use of STEMI and NSTEMI in clinical practice, and the gradual implementation of coding standards and guidelines for these specific diagnoses in electronic hospital data (Supplementary Methods). The National Clinical Coding Standards used in England during this period required that an MI be coded as unspecified unless transmural or subendocardial damage were recorded (even if STEMI or NSTEMI were detailed in the medical notes).<sup>11, 12</sup> In contrast, since 2004 the Australian Coding Standards indicate that

1  
2  
3 the 4<sup>th</sup>-digit codes for STEMI and NSTEMI can be used if recorded in the medical notes,  
4  
5 irrespective of whether the severity of myocardial damage is noted.  
6

7  
8 The WHO ICD-10 manual states that the code I22.x "...should be assigned for infarction of any  
9 myocardial site, occurring within 4 weeks (28 days) from onset of a previous infarction."<sup>4</sup> In  
10 Australia, coding standards are consistent with this descriptor. In contrast, English coders had  
11 been instructed to assign I22 for an admission if there was documentation of any previous MI in  
12 the patient's medical record, no matter when the preceding MI occurred. This standard was  
13 modified in 2012<sup>12</sup> so that an MI occurring more than 4 weeks after an acute MI is now classified  
14 as I21, thus becoming congruent with the coding standard in Australia.  
15  
16  
17  
18  
19

### 20 21 22 23 **Case Identification**

24  
25 For the current analysis, all hospital records coded as I21 or I22 in the principal diagnosis field  
26 were identified for people aged 35 to 84 years from both datasets. We defined STEMI as I21.0–  
27 I21.3, NSTEMI as I21.4, unspecified MI as I21.9, and subsequent MI as I22. All interhospital  
28 transfers were accounted for by identifying contiguous series of admissions. For example, if a  
29 patient was discharged from one hospital and admitted to another within one day, both  
30 admissions were classified as part of the same hospital stay and counted once. We also created  
31 28-day episodes for each MI type, where any MI readmission occurring within 28-days of an  
32 index MI was classified as part of the index episode. This was to determine whether any  
33 observed differences in proportions and trends in each MI type were impacted by jurisdictional  
34 differences in early discharge and readmission practices. Our analysis showed proportions and  
35 trends in each MI type were consistent with the main results of the study (data not shown).  
36  
37  
38  
39  
40  
41  
42  
43  
44  
45  
46  
47

### 48 **Statistical Analysis**

49  
50 MI type is presented separately for England and WA as proportions of all MI admissions in each  
51 year. Age- and sex-standardised hospitalisation rates were calculated using the direct method for  
52 all MI, and for each MI type, separately for each jurisdiction. The numerator was the number of  
53 admissions for each MI type per year, and the denominator was the sex/5-year age group  
54  
55  
56  
57  
58  
59  
60

1  
2  
3 population number for each of England and WA respectively. NSTEMI and unspecified MI are  
4 often analysed as a combined group in administrative data studies,<sup>13, 14</sup> therefore we also  
5 calculated proportions and rates for NSTEMI/unspecified MI combined to allow comparison  
6 with published data. Rates were standardised by sex and 5-year age group using the 2013  
7 European Standard Population as the standard. Age- and sex- adjusted trends were estimated  
8 from Poisson regression models which included 5-year age group, sex and calendar year  
9 (continuous). Statistical analyses were undertaken using SAS version 9.4.  
10  
11  
12  
13  
14  
15  
16  
17  
18

## 19 RESULTS:

20  
21 From 2000 to 2013, there were 931,057 hospitalisations for all MI in England. In 2000, 49% of  
22 all MI admissions were for STEMI, decreasing to 35% by 2013 (Figure 1). NSTEMI comprised  
23 less than 10% throughout most of the period, apart from a small increase through the mid-2000s.  
24 In contrast, unspecified MI increased from nearly one third of all MI admissions in 2000 to make  
25 up 60% by 2013. Records coded as subsequent MI increased from 13% to 21% of all admissions  
26 in 2011, but decreased to <1% in the last year of the study period.  
27  
28  
29  
30  
31

32 In WA for the same period, there were 41,113 hospital admissions for all MI. STEMI accounted  
33 for 59% in 2000, decreasing to 25% of MI admissions by 2013 (Figure 1). In contrast, NSTEMI  
34 increased from 24% to 73% of all MI admissions by 2013. Unspecified MI was only a small  
35 proportion of cases throughout the study period, decreasing from 16% in 2000, to 1% by 2013.  
36 Subsequent MI was rarely coded in WA data (~1% of admissions annually).  
37  
38  
39  
40  
41

42 NSTEMI and unspecified MI in combination accounted for 37% of all MI admissions in England  
43 and WA in 2000, increasing to 63% and 75% respectively by 2013 . In both England and WA  
44 data, the proportion of cases coded as STEMI was higher in men than women, with lower  
45 proportions of unspecified MI in men than women in both data sources (Supplementary Figure  
46 1). Trends in the proportion of each MI type were similar between men and women.  
47  
48  
49  
50

51 Age- and sex-standardised rates of all MI admissions were similar between the two data sources  
52 in the first years of the study period (Figure 2). However temporal trends differed, with all MI  
53 declining in England and increasing slightly in WA (Table 1). Rates of STEMI were higher in  
54 WA than England at the beginning of the period (173/100,000 versus 139/100,000 person-years)  
55  
56  
57  
58  
59  
60



1  
2  
3 however rates declined in both jurisdictions to ~80/100,000 in 2013. The significant increase in  
4 NSTEMI and decline in unspecified MI rates in WA was converse to that seen in the English  
5 data. Rates of subsequent MI were <5/100,000 person-years throughout the period in WA, in  
6 contrast to an average of ~ 40/100,000 person-years in England. The age- and sex-adjusted  
7 average change in subsequent MI rates in England was -4.6%/year (95% CI -4.5%, -4.7%) for  
8 the overall study period. However when the period was restricted to 2000 to 2011, the trend was  
9 marginally upward (+0.9%/year, 95% CI +0.7, +1.0%). Similarly for unspecified MI, there was  
10 an attenuation of the upward trend in rates when the period was restricted (+0.6%/year, 95% CI  
11 +0.5%, +0.7%, 2000 to 2011). There was a sharp downturn in rates of subsequent MI in England  
12 in 2012, declining from 43/100,000 person-years to 1/100,000 person-years by 2013, with  
13 concomitant increases in STEMI and unspecified MI rates  
14  
15  
16  
17  
18  
19  
20  
21  
22  
23  
24

25 Table 1. Age- and sex-adjusted trends in all myocardial infarction, and myocardial infarction types, in  
26 England and Western Australia, based on International Classification of Diseases coding.  
27

|                | Average annual % change (95% confidence interval) |                           |
|----------------|---------------------------------------------------|---------------------------|
|                | England                                           | Western Australia         |
| STEMI          | -6.5% (-6.6, -6.4)                                | -5.5 (-5.9, -5.1)         |
| NSTEMI         | -6.1% (-6.2, -5.9)                                | +10.2 (+9.8, +10.6)       |
| Unspecified MI | +2.8 (+2.7, +2.9)                                 | -15.9 (-16.7, -15.0)      |
| Subsequent MI  | -4.6 (-4.7, -4.5)                                 | -2.2 (-5.0, +0.6)         |
| <b>All MI</b>  | <b>-2.7 (-2.8, -2.6)</b>                          | <b>+1.7% (+1.4, +1.9)</b> |

28  
29  
30  
31  
32  
33  
34  
35  
36  
37 STEMI, ST-elevation myocardial infarction; NSTEMI, non-ST-elevation myocardial infarction; MI, myocardial  
38 infarction.  
39  
40  
41  
42  
43  
44  
45  
46  
47  
48  
49  
50  
51  
52  
53  
54  
55  
56  
57  
58  
59  
60

## DISCUSSION

We found differences in temporal trends of admissions for all MI and some MI types identified from English and WA whole-population electronic hospital data from 2000 to 2013. In England, rates of total MI declined while there was a slight increase in rates in WA. Using the 4<sup>th</sup>-digit ICD-10 code to identify MI types produced low rates and proportions of NSTEMI admissions in English data, which differed significantly from WA data. Unspecified MI and subsequent MI have been more frequently coded in England compared with WA. In contrast, the proportion of admissions and age-adjusted trends in rates of STEMI are similar between the two data sources despite differences in coding standards.

### Identification of STEMI and NSTEMI using ICD-10 codes

The proportion of all MI admissions comprised of STEMI and decline in rates was similar in both jurisdictions and consistent with trends in other studies.<sup>6</sup> In contrast, there was a very low proportion and no upward trend in rates of NSTEMI admissions in England. This is inconsistent with registry studies, including the Myocardial Ischaemia National Audit Project (MINAP) in England, where the overall proportion of NSTEMI cases in 2003-2010 was 51%.<sup>15</sup> The increasing proportion of NSTEMI and decreasing STEMI admissions in the WA data corresponds with the coding standards in place and data from clinical registries in Australia.<sup>16</sup> The high proportion of MI admissions recorded as unspecified in the English national hospitalisation data is congruent with the English coding standards in place during the study period, which are likely to have facilitated the coding of unspecified MI instead of NSTEMI and STEMI, although the pattern in NSTEMI admissions likely indicates a greater misclassification in this group.

Aggregation of NSTEMI and unspecified MI is an approach used previously in electronic hospital data studies as a means of accounting for unspecified MI admissions.<sup>17</sup> Previous validation of a sample of MI cases found unspecified MI to be more closely aligned with NSTEMI<sup>14</sup> although this has not been formally tested in English and Australian data. Using this method with the English data produced a temporal pattern for NSTEMI more compatible with observed proportions and trends in WA and elsewhere. However, because of the coding

standards, there is still likely misclassification of an unknown proportion of STEMI cases into this grouping, and the coding of STEMI and NSTEMI admissions as non-specific subsequent MI further complicates interpretation.

The change to coding standards in Australia in 2004, where STEMI and NSTEMI were first listed alongside the relevant I21 codes, appear to have had little impact on trends in these subtypes. The increasing and decreasing proportions of NSTEMI and STEMI cases respectively appear to predate the inclusion of these descriptors in the Australian version of ICD-10. In contrast, changes to the coding standards in England in 2012 appear to have contributed to a marked decline in the proportion of cases coded as subsequent MI from 2012, with most of the shift in coding towards STEMI and unspecified MI.

Despite the increasing number of studies using ICD codes to stratify MI by ST-elevation status, there is limited validation of the ICD codes which nominally indicate STEMI or NSTEMI. Additionally, coding standards and guidelines for their application relevant to the dataset are often not reported. While positive predictive value (PPV) for the recording of MI overall in electronic hospital data is reasonably high (~90% in England,<sup>18</sup> 85% in WA<sup>19</sup>), data from the Kaiser Permanente database in the US reported different PPV for STEMI and NSTEMI cases (79% and 91% respectively, based on ICD-9-CM codes).<sup>14</sup> Similar differences in PPV between STEMI and NSTEMI were reported from an Australian case review using both ICD-9-CM and ICD-10-AM codes.<sup>20</sup> Descriptors for STEMI and NSTEMI were added to the transmural and subendocardial MI codes in ICD-9-CM in the US in 2005,<sup>21</sup> but were rarely included in this ICD version in other jurisdictions including Australia.

### Comparisons of trends

There are an increasing number of studies reporting temporal trends in rates of STEMI and NSTEMI using electronic health data. The US Kaiser Permanente study, and Irish and German national administrative data studies report consistently significant reductions in rates of STEMI since the late 1990s.<sup>14, 17, 22</sup> Results from community-based studies using medical notes to classify MI types in the US, including the Atherosclerosis Risk in Communities (ARIC) and Olmsted County studies, support these findings, and highlight reductions in STEMI as being independent of the introduction of troponin.<sup>5, 6</sup> In our study, trends in STEMI hospitalisation rates in England and WA are consistent with these reports.

1  
2  
3  
4  
5  
6  
7  
8  
9  
10  
11  
12  
13  
14  
15  
16  
17  
18  
19  
20  
21  
22  
23  
24  
25  
26  
27  
28  
29  
30  
31  
32  
33  
34  
35  
36  
37  
38  
39  
40  
41  
42  
43  
44  
45  
46  
47  
48  
49  
50  
51  
52  
53  
54  
55  
56  
57  
58  
59  
60

Population-level trends in NSTEMI are less consistent across studies. The ARIC study found no significant change in rates of first NSTEMI from 1997 to 2008,<sup>5</sup> in contrast to increasing rates in Olmsted County,<sup>6</sup> Ireland<sup>17</sup> and small increases in rates in Germany.<sup>22</sup> The marked difference in NSTEMI rates and trends between England and WA in the current report add to these inconsistencies. Variations in troponin assay sensitivity and implementation of diagnostic guidelines for MI could contribute to these differences, and the magnitude of upward trend in NSTEMI rates in Australia appears significantly greater than in other jurisdictions. In England, variation in the actual recording of NSTEMI diagnoses at the hospital level has been reported,<sup>23</sup> and combined with coding standards which until recently promoted recording of unspecified MI, are likely major contributors to the low NSTEMI rates in English national data.

## Implications

Our results have implications for the use of ICD codes in identifying MI type from electronic hospital data. The coding standards in place in England until 2015 suggest that English electronic hospital data are unlikely to be reliable for differentiating STEMI and NSTEMI admissions. In particular, it is unlikely that the 4<sup>th</sup> digit codes for NSTEMI can be reliably used for population-level temporal trend analyses or in followup studies for defined patient cohorts in England without adjudication of diagnoses from medical notes. Conversely, the large increase in NSTEMI rates and cumulative increase in all MI rates in WA differs from many studies from other countries, where trends in MI rates have continued downward, despite the effect of troponin testing.<sup>24,25</sup> This necessitates some caution in the use of ICD-10 codes for reporting temporal trends in NSTEMI in Australia using electronic hospital data, although the proportion of MI comprised of NSTEMI in contemporary data is consistent with that in ACS registries.<sup>26</sup>

Our results are also of relevance for population monitoring of incidence and hospitalisation rates of all MI. In England there is high concordance between electronic hospital records and general practice datasets for the recording of total MI (I21, I22)<sup>27</sup> and similarly in Australia, thus indicating that these data remain a reliable and pragmatic means of monitoring rates of all MI in the population. In terms of identifying incidence (first-ever cases), the coding standard for subsequent MIs in place in England up until 2012 is unlikely to have ensured accurate identification of all first-ever MIs as coders would not always have had access to all hospital

1  
2  
3 records and medical history for a patient. The use of linked datasets using hospital data alone or  
4 multiple sources therefore remains a necessary mainstay of monitoring MI incidence.  
5  
6  
7  
8  
9

## 10 **Strengths and Limitations**

11  
12 The large number of admissions in both datasets allowed examination of each coded MI type  
13 annually over a relevant extended period. Although population sizes differ, the use of  
14 proportions and age-standardised rates allowed for comparison between the two jurisdictions.  
15 Although we were aware of the coding standards in place in each jurisdiction, there can be local  
16 differences in instructions to coders and application of standards which could affect the results.  
17 The WA results in the current study are likely to be generalisable nationally, as the coding  
18 standards described here are applied nationally, and the Australian Institute of Health and  
19 Welfare have reported national MI trends and rates of the subsequent MI code using unlinked  
20 data which support the WA results in our study.<sup>8</sup> We were unable to validate the recording of  
21 STEMI and NSTEMI in administrative data against clinical data for the purpose of this analysis.  
22 In WA, we are currently pursuing this using a random sample of MI cases to compare medical  
23 records and ECG findings against recording of the 4<sup>th</sup>-digit ICD code for MI type in electronic  
24 hospital data. As national hospitalisation data in Australia are unlinked, WA linked data was  
25 used for the current study, thus removing double counting of events due to inter-hospital transfer,  
26 and allowing direct comparison with English linked data  
27  
28  
29  
30  
31  
32  
33  
34  
35  
36  
37  
38  
39  
40  
41

## 42 **Conclusions**

43  
44 Understanding population-level trends in MI remains an important component of monitoring the  
45 effectiveness of management and prevention of CHD. Electronic health data are a pragmatic  
46 means of collecting information and reporting trends for MI. However, our results highlight the  
47 necessity for understanding coding standards when using specific codes such as MI type from  
48 administrative data, and call into question the accuracy of 4<sup>th</sup>-digit ICD codes to identify STEMI  
49 and NSTEMI for use in monitoring and follow-up studies across jurisdictions. The use of such  
50 codes should be investigated in each jurisdiction prior to widespread use for monitoring and  
51 analyses of outcomes. Changes in clinical classification and practice such as have occurred with  
52  
53  
54  
55  
56  
57  
58  
59  
60

1  
2  
3 MI are not always reflected in ICD codes or standards in a timely manner, and our results  
4 highlight the potential for wide variation in the use of such codes in different jurisdictions.  
5  
6  
7  
8  
9

10 **Funding:** This work was supported by the National Health and Medical Research Council of  
11 Australia (NHMRC) and a Research Collaboration Award from The University of Western  
12 Australia. The Unit of Health-Care Epidemiology is supported by the NIHR Biomedical  
13 Research Centre, Oxford.  
14  
15  
16

17  
18 **Acknowledgements:** The authors wish to thank the staff at the Western Australian Data Linkage  
19 Branch, the Department of Health Inpatient Data Collections and Registrar General; and staff at  
20 Unit of Health-Care Epidemiology, Nuffield Department of Population Health, University of  
21 Oxford. LN is supported by a NHMRC Early Career Fellowship.  
22  
23  
24

25  
26  
27 **Contributors:** LN and FLW conceived the study; LN carried out the data analysis and wrote the  
28 manuscript; LN, FLW, DL, FS, MG, and MH reviewed the data, provided interpretation and  
29 critical revisions, and reviewed all drafts of the manuscript.  
30  
31  
32

33  
34 **Competing Interests:** None declared  
35  
36

37  
38 **Data sharing statement:** No additional data are available.  
39  
40

41 **Ethics Approvals:** Ethical approval was obtained from the Central and South Bristol Multi-  
42 Centre Research Ethics Committee (04/Q2006/176) for the building and analysis of the English  
43 national record-linked data by the Unit of Health-Care Epidemiology. Approval for use of the  
44 WA data was obtained from the WA Department of Health and UWA Human Research Ethics  
45 Committee.  
46  
47  
48  
49  
50  
51  
52  
53  
54  
55  
56  
57  
58  
59  
60

## REFERENCES

1. World Health Organization. The top 10 causes of death. 2014 [cited 2015 01 July ]. Available from: <http://www.who.int/mediacentre/factsheets/fs310/en/>
2. Beaglehole R, Stewart AW, Jackson R, et al. Declining rates of coronary heart disease in New Zealand and Australia, 1983-1993. *Am J Epidemiol* 1997;145(8):707-713.
3. Chew DP, Scott IA, Cullen L, et al. National Heart Foundation of Australia and Cardiac Society of Australia and New Zealand: Australian clinical guidelines for the management of acute coronary syndromes 2016. *Med J Aust* 2016;205(3):128-133.
4. World Health Organization. International Statistical Classification of Diseases and Related Health Problems 10th revision (ICD-10)-2015. 2015. Available from: <http://apps.who.int/classifications/icd10/browse/2015/en#/I20-I25>
5. Rosamond WD, Chambless LE, Heiss G, et al. Twenty-two-year trends in incidence of myocardial infarction, coronary heart disease mortality, and case fatality in 4 US communities, 1987–2008. *Circulation* 2012 April 17, 2012;125(15):1848-1857.
6. Roger VL, Weston SA, Gerber Y, et al. Trends in incidence, severity, and outcome of hospitalized myocardial infarction. *Circulation* 2010;121(7):863-869.
7. Smolina K, Wright FL, Rayner M, et al. Determinants of the decline in mortality from acute myocardial infarction in England between 2002 and 2010: linked national database study. *BMJ* 2012;344:d8059.
8. Australian Institute of Health and Welfare. Monitoring acute coronary syndrome using national hospital data: an information paper on trends and issues. Canberra; 2011. Report No.: Cat. no. CVD 57. .
9. Nedkoff L, Knuiman M, Hung J, et al. Comparative trends in the incidence of hospitalized myocardial infarction and coronary heart disease in adults with and without diabetes mellitus in Western Australia from 1998 to 2010. *Circ Cardiovasc Qual Outcomes* 2014;7(5):708-717.
10. National Centre for Classification in Health. The International Statistical Classification of Diseases and related health problems, tenth revision, Australian modification (ICD-10-AM): tabular list. Seventh ed. University of Sydney: National Centre for Classification in Health; 2004.
11. Health & Social Care Information Centre. Clinical Coding Instruction Manual ICD-10 version 2.0. 2007.
12. Health & Social Care Information Centre. National Clinical Coding Standards ICD-10 4th Edition. 2012.
13. Yin W-H, Lu T-H, Chen K-C, et al. The temporal trends of incidence, treatment, and in-hospital mortality of acute myocardial infarction over 15 years in a Taiwanese population. *Int J Cardiol* 2016;209:103-113.

14. Yeh RW, Sidney S, Chandra M, et al. Population trends in the incidence and outcomes of acute myocardial infarction. *N Engl J Med* 2010 June 10, 2010;362(23):2155-2165.
15. Butland BK, Atkinson RW, Milojevic A, et al. Myocardial infarction, ST-elevation and non-ST-elevation myocardial infarction and modelled daily pollution concentrations: a case-crossover analysis of MINAP data. *OpenHeart* 2016;3:e000429.doi:10.1136/openhrt-2016-000429.
16. Chew DP, French J, Briffa TG, et al. Acute coronary syndrome care across Australia and New Zealand: the SNAPSHOT ACS study. *Med J Aust* 2013;199:1-7.
17. Jennings SM, Bennett K, Lonergan M, et al. Trends in hospitalisation for acute myocardial infarction in Ireland, 1997-2008. *Heart* 2012;98(17):1285-1289.
18. Herrett E, Shah AD, Boggon R, et al. Completeness and diagnostic validity of recording acute myocardial infarction events in primary care, hospital care, disease registry, and national mortality records: cohort study. *BMJ* 2013;346:f2350.
19. Sanfilippo FM, Hobbs MST, Knuiman MW, et al. Can we monitor heart attack in the troponin era: evidence from a population-based cohort study. *BMC Cardiovasc Disord* 2011;11:35.
20. Wong CX, Sun MT, Lau DH, et al. Nationwide trends in the incidence of acute myocardial infarction in Australia, 1993-2010. *Am J Cardiol* 2013;112:169-173.
21. Cannon CP. Update to International Classification of Diseases, 9th revision codes: distinguishes STEMI from NSTEMI. *Crit Pathw Cardiol* 2005;4:185-186.
22. Freisinger E, Fuerstenber T, Malyar NM, et al. German nationwide data on current trends and management of acute myocardial infarction: discrepancies between trials and real-life. *Eur H J* 2014;35:979-988.
23. Herrett E, Smeeth L, Walker L, et al, on behalf of the MINAP Academic Group. The Myocardial Ischaemia National Audit Project (MINAP). *Heart* 2010;96:1264-1267.
24. Sulo G, Igland J, Nygård O, et al. Favourable trends in incidence of AMI in Norway during 2001-2009 do not include younger adults: a CVDNOR project. *Eur J Prev Cardiol* 2013;21(11):1358-1364.
25. Koopman C, Bots ML, van Dis I, et al. Shifts in the age distribution and from acute to chronic coronary heart disease hospitalizations. *Eur J Prev Cardiol* 2016;23(2):170-177.
26. Chung S-C, Gedeberg R, Nicholas O, et al. Acute myocardial infarction: a comparison of short-term survival in national outcome registries in Sweden and the UK. *Lancet* 2014;383(9925):1305-1312.
27. Wright FL, Green J, Canoy D, et al. Vascular disease in women: comparison of diagnoses in hospital episode statistics and general practice records in England. *BMC Med Res Methodol* 2012;12:161.



**Figure legends:**

Figure 1. Types of myocardial infarction as a proportion of all myocardial infarction admissions, from (A) linked English hospitalisation data and (B) linked Western Australian hospitalisation data. *STEMI*, *ST-elevation myocardial infarction*; *NSTEMI*, *non-ST-elevation myocardial infarction*; *MI*, *myocardial infarction*.

Figure 2. Age- and sex-standardised rates of all myocardial infarction, and myocardial infarction types, based on International Classification of Diseases codes, from (A) linked English national hospitalisation data, and (B) linked Western Australian hospitalisation data. *STEMI*, *ST-elevation myocardial infarction*; *NSTEMI*, *non-ST-elevation myocardial infarction*; *MI*, *myocardial infarction*.

Supplementary Figure 1. Proportion of each myocardial infarction type as a proportion of all myocardial infarction admissions stratified by sex, from linked English hospitalisation data for (A) men and (B) women, and linked Western Australian hospitalisation data for (C) men and (D) women.

1  
2  
3  
4  
5  
6  
7  
8  
9  
10  
11  
12  
13  
14  
15  
16  
17  
18  
19  
20  
21  
22  
23  
24  
25  
26  
27  
28  
29  
30  
31  
32  
33  
34  
35  
36  
37  
38  
39  
40  
41  
42  
43  
44  
45  
46  
47  
48  
49  
50  
51  
52  
53  
54  
55  
56  
57  
58  
59  
60

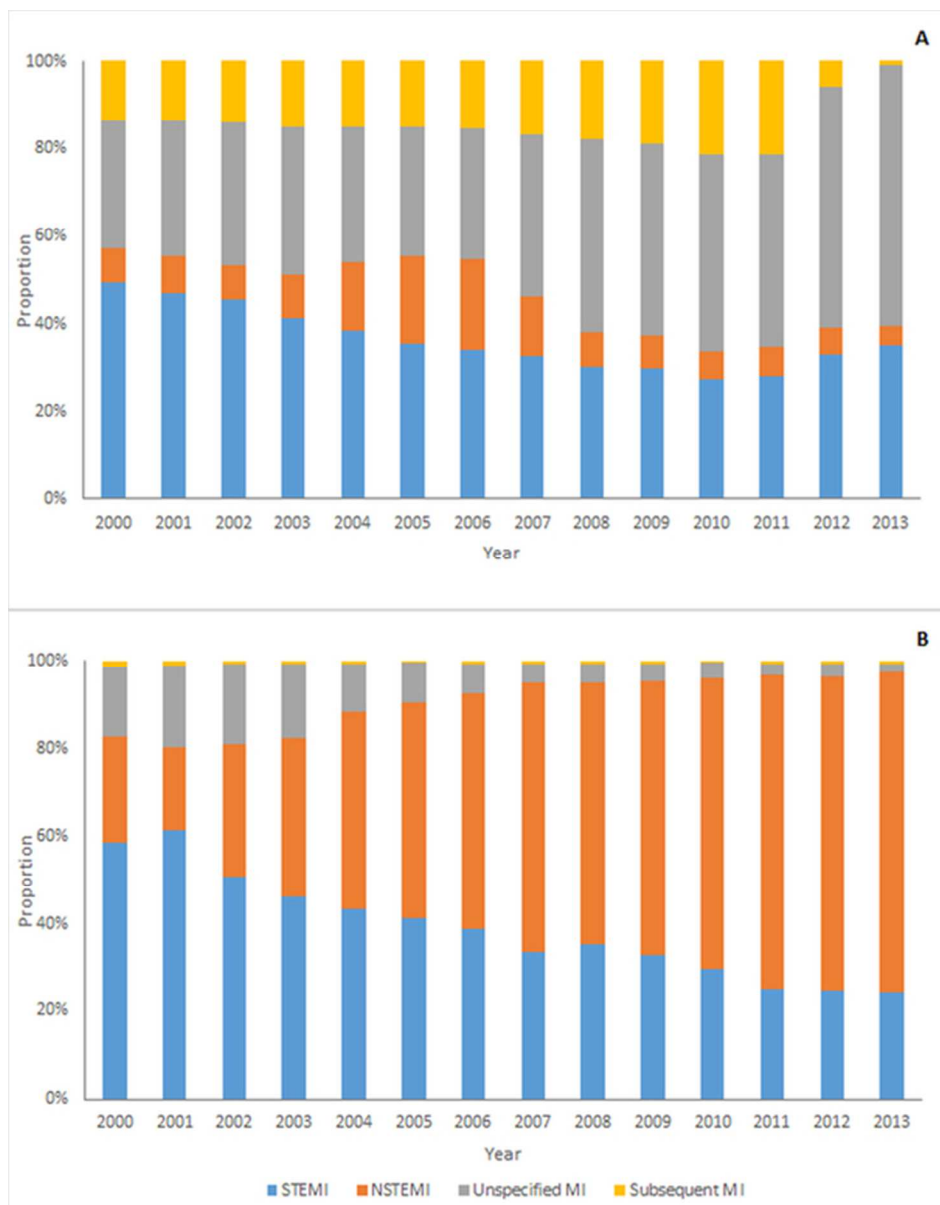

Figure 1

25x32mm (600 x 600 DPI)

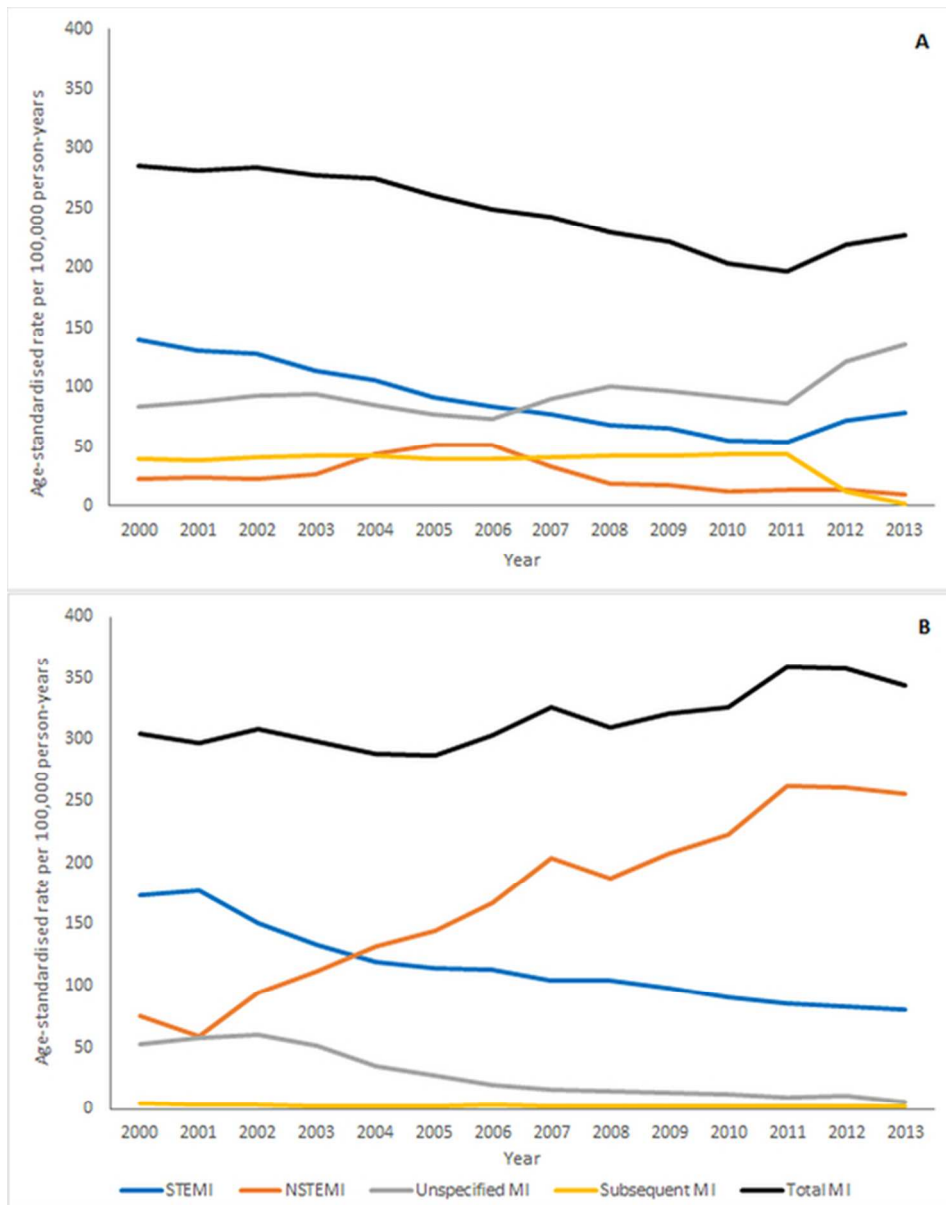

Figure 2

25x32mm (600 x 600 DPI)

**Supplementary Table 1.**

WHO International Classification of Diseases, 10<sup>th</sup> revision (ICD-10) codes for acute and subsequent myocardial infarction (MI) and study classification of MI type.

| ICD-10 code | Description                                        | Study classification |
|-------------|----------------------------------------------------|----------------------|
| <b>I21</b>  | <b>Acute transmural MI of:</b>                     |                      |
| I21.0       | anterior wall                                      | STEMI                |
| I21.1       | inferior wall,                                     |                      |
| I21.2       | other sites                                        |                      |
| I21.3       | unspecified site                                   |                      |
| I21.4       | acute subendocardial MI/<br>acute nontransmural MI | NSTEMI               |
| I21.9       | acute MI, unspecified                              | Unspecified MI       |
| <b>I22</b>  | <b>Subsequent MI of:</b>                           | Subsequent MI        |
| I22.0       | anterior wall                                      |                      |
| I22.1       | inferior wall                                      |                      |
| I22.8       | other sites                                        |                      |
| I22.9       | unspecified site                                   |                      |

**Supplementary Methods:****Standards for the coding of myocardial infarction in England and Australia**

Prior to 2007, medical record coders in England were directed to assign the 4<sup>th</sup>-digit code for I21 based on the extent of damage to the myocardial wall (transmural or subendocardial). Updated directives in 2007 noted continuation of these standards, with an additional statement that unspecified MI should be recorded if the extent of myocardial damage was not stated, even where STEMI or NSTEMI were mentioned in the patient record.<sup>11</sup> These standards remained in place through subsequent updates until 2014, when the National Clinical Coding Standards, 4<sup>th</sup> edition, introduced the first specific instructions to code STEMI (I21.0-I21.3) or NSTEMI (I21.4) irrespective of whether degree of myocardial damage is noted.

1  
2  
3 In Australia prior to 2004, there were no specific instructions for the coding of STEMI or  
4 NSTEMI, rather coding was based on the use of the codes for transmural or subendocardial  
5 infarction. Following the introduction of STEMI and NSTEMI into ICD-10-AM in 2004,  
6  
7 coders have been instructed that I21.0-I21.3 (depending on infarct location) should be coded  
8 if STEMI is recorded as the discharge diagnosis, and I21.4 if NSTEMI is recorded.<sup>10</sup> These  
9 standards have remained in place in subsequent editions of ICD-10-AM.  
10  
11  
12  
13  
14  
15  
16  
17  
18  
19  
20  
21  
22  
23  
24  
25  
26  
27  
28  
29  
30  
31  
32  
33  
34  
35  
36  
37  
38  
39  
40  
41  
42  
43  
44  
45  
46  
47  
48  
49  
50  
51  
52  
53  
54  
55  
56  
57  
58  
59  
60

For peer review only

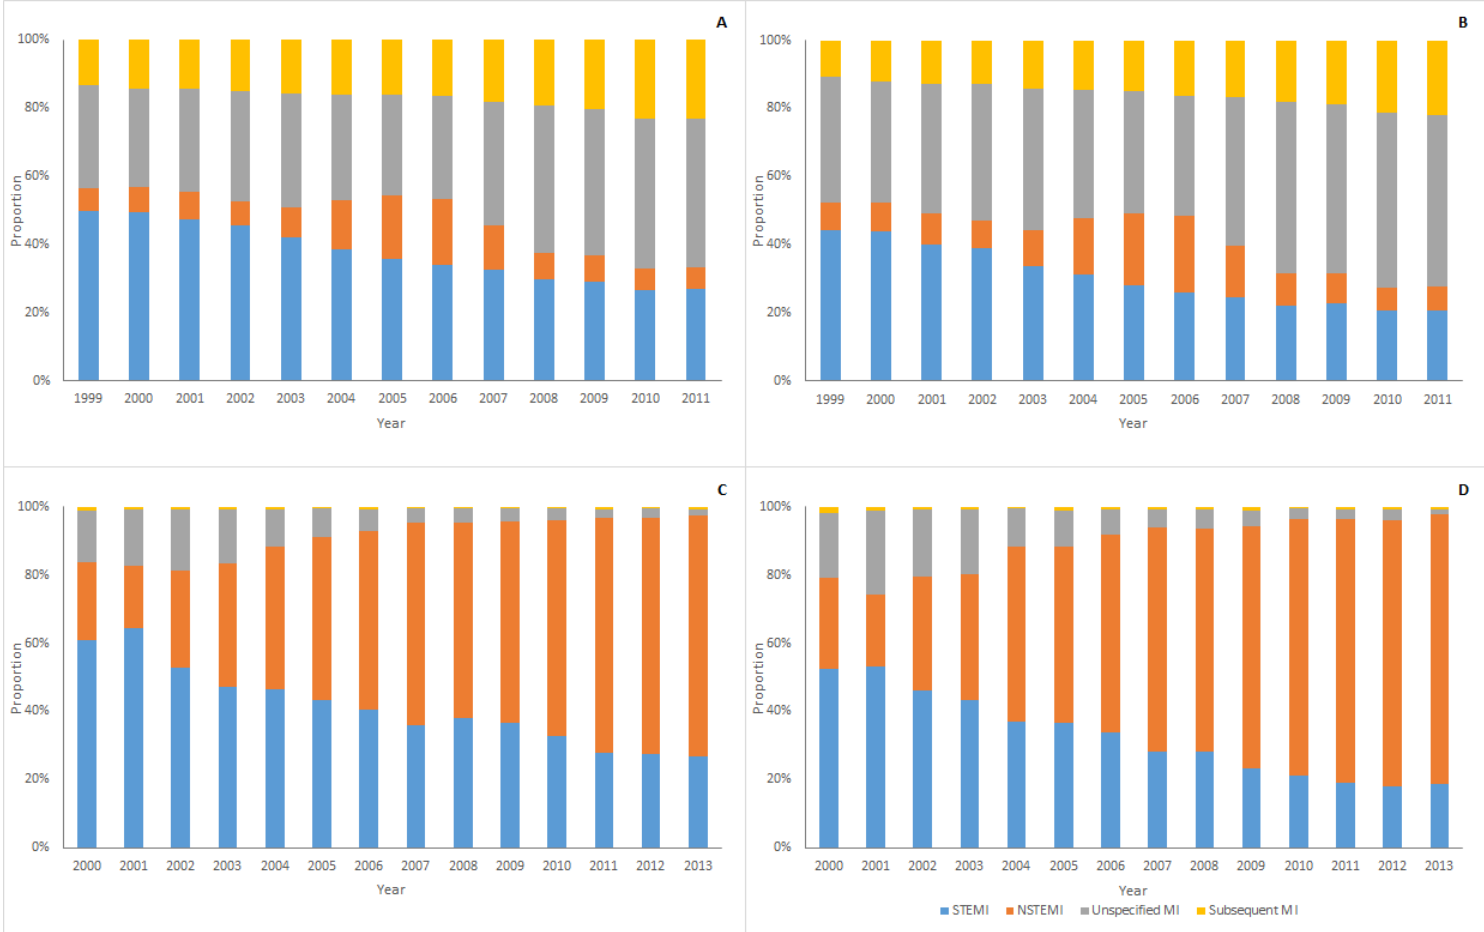

Supplementary Figure 1. Proportion of each myocardial infarction type as a proportion of all myocardial infarction admissions stratified by sex, from linked English hospitalisation data for (A) men and (B) women, and linked Western Australian hospitalisation data for (C) men and (D) women.

1  
2  
3  
4  
5  
6  
7  
8  
9  
10  
11  
12  
13  
14  
15  
16  
17  
18  
19  
20  
21  
22  
23  
24  
25  
26  
27  
28  
29  
30  
31  
32  
33  
34  
35  
36  
37  
38  
39  
40  
41  
42  
43  
44  
45  
46  
47
